# Supplementary material for: Adsorption of iii/v ions (In(iii), Ga(iii) and As(v)) onto SiO2, CeO2 and Al2O3 nanoparticles used in the semiconductor industry
Source: Royal Society of Chemistry journal article supplement (doi:10.1039/c6en00184j), 2016-01-01
Supplement: c6en00184j1.pdf [file c6en00184j1.pdf]

Electronic Supplementary Information for:  
**Adsorption of III/V ions (In(III), Ga(III) and As(V)) to SiO<sub>2</sub>, CeO<sub>2</sub>  
and Al<sub>2</sub>O<sub>3</sub> nanoparticles used in the semiconductor industry**

Xiangyu Bi and Paul Westerhoff \*

School of Sustainable Engineering and The Built Environment, Arizona State University, PO  
Box 873005, Tempe, Arizona, USA

\*Email: [p.westerhoff@asu.edu](mailto:p.westerhoff@asu.edu)

Phone: +1 480 965 2885

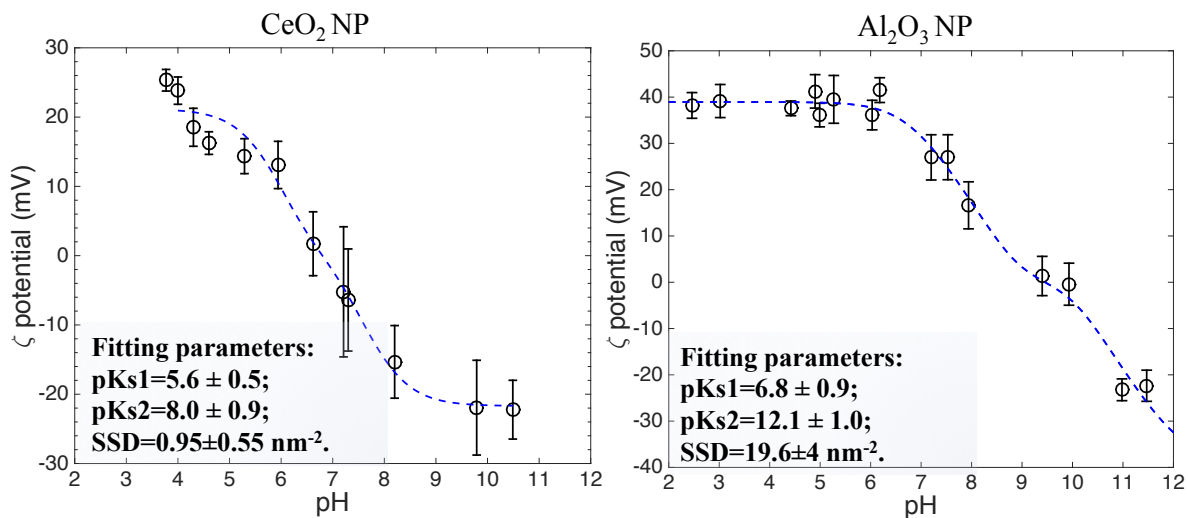

**Figure S1.** Zeta-potential of CeO<sub>2</sub> and Al<sub>2</sub>O<sub>3</sub> NPs as a function of pH. The markers are the experimental measurement, and the solid line is the diffusive layer model fit (Table 1). The model fit parameterizes the  $pK_s$  values of surface  $-OH$  groups and the surface site density (SSD), which are given with the charts.

**Table S1.** Hydrolysis of In(III), Ga(III) and As(V) ions and the equilibrium constants.

| Equation                                                                                         | Equilibrium             |        |                                          |
|--------------------------------------------------------------------------------------------------|-------------------------|--------|------------------------------------------|
|                                                                                                  | Constant<br>(logK)      | Value  | Source                                   |
| $\text{HAsO}_4^{2-} \rightleftharpoons \text{H}^+ + \text{AsO}_4^{3-}$                           | $\log(K_1^{\text{As}})$ | -11.6  | Drever, 1997 <sup>3</sup>                |
| $\text{H}_2\text{AsO}_4^- \rightleftharpoons 2\text{H}^+ + \text{AsO}_4^{3-}$                    | $\log(K_2^{\text{As}})$ | -18.36 | Drever, 1997 <sup>3</sup>                |
| $\text{H}_3\text{AsO}_4 \rightleftharpoons 3\text{H}^+ + \text{AsO}_4^{3-}$                      | $\log(K_3^{\text{As}})$ | -20.6  | Drever, 1997 <sup>3</sup>                |
| $\text{In}^{3+} + \text{H}_2\text{O} \rightleftharpoons \text{In}(\text{OH})^{2+} + \text{H}^+$  | $\log(K_1^{\text{In}})$ | -3.48  | Biryuk et al., 1986 <sup>4</sup>         |
| $\text{In}^{3+} + 2\text{H}_2\text{O} \rightleftharpoons \text{In}(\text{OH})_2^+ + 2\text{H}^+$ | $\log(K_2^{\text{In}})$ | -7.67  | Biryuk et al., 1986 <sup>4</sup>         |
| $\text{In}^{3+} + 3\text{H}_2\text{O} \rightleftharpoons \text{In}(\text{OH})_3^+ + 3\text{H}^+$ | $\log(K_3^{\text{In}})$ | -12.75 | Biryuk et al., 1986 <sup>4</sup>         |
| $\text{Ga}^{3+} + \text{H}_2\text{O} \rightleftharpoons \text{Ga}(\text{OH})^{2+} + \text{H}^+$  | $\log(K_1^{\text{Ga}})$ | -2.87  | Biryuk and Nazarenko, 1973 <sup>5</sup>  |
| $\text{Ga}^{3+} + 2\text{H}_2\text{O} \rightleftharpoons \text{Ga}(\text{OH})_2^+ + 2\text{H}^+$ | $\log(K_2^{\text{Ga}})$ | -6.55  | Biryuk and Nazarenko, 1973 <sup>5</sup>  |
| $\text{Ga}^{3+} + 3\text{H}_2\text{O} \rightleftharpoons \text{Ga}(\text{OH})_3^+ + 3\text{H}^+$ | $\log(K_3^{\text{Ga}})$ | -11.07 | Biryuk and Nazarenko, 1973 <sup>5</sup>  |
| $\text{Ga}^{3+} + 4\text{H}_2\text{O} \rightleftharpoons \text{Ga}(\text{OH})_4^- + 4\text{H}^+$ | $\log(K_4^{\text{Ga}})$ | -17.3  | Vagramjan and Leshawa, 1967 <sup>6</sup> |

## Relate the surface site density (SSD) to the NP size for colloidal SiO<sub>2</sub> NPs

For a spherical colloidal SiO<sub>2</sub> NP, we denote  $p$  as the number of Si atoms across the diameter of the sphere, in the unit of nm<sup>-1</sup>. The total number of Si atoms in this sphere is:

$$N_t = \frac{\pi \cdot p^3}{6} \quad \text{Eq(S1)}$$

where,  $N_t$  is the total number of Si in the sphere.

The weight of this SiO<sub>2</sub> NP is calculated as:

$$w_{NP} = \frac{N_t \cdot MW}{N_A} = \frac{\pi \cdot p^3 \cdot MW}{6N_A} \quad \text{Eq(S2)}$$

where,  $w_{NP}$  is the weight of the SiO<sub>2</sub> NP and MW is the molecular weight of SiO<sub>2</sub> (28.1 g • mol<sup>-1</sup>).

$w_{NP}$  is also calculated as:

$$w_{NP} = \rho \cdot \frac{1}{6} \cdot \pi \cdot d^3 \quad \text{Eq(S3)}$$

where  $\rho$  is the density of colloidal SiO<sub>2</sub> NPs and  $d$  is the particle diameter.

Eq(S2) and Eq(S3) give:

$$p = \left( \frac{\rho \cdot N_A}{MW} \right)^{\frac{1}{3}} \cdot d \quad \text{Eq(S4)}$$

For colloidal SiO<sub>2</sub> NPs,  $\rho$  is 2.2 g • cm<sup>-3</sup> and MW is 28.1 g • mol<sup>-1</sup>. Substituting these values into Eq(S4) gives:

$$p = 2.80d \quad \text{Eq(S5)}$$

where  $d$  is in nm.

Based on Eq(S1), the number of Si atom on the sphere surface ( $N_s$ ) is calculated as:

$$N_s = \frac{1}{6} \pi (p^3 - (p-2)^3) \quad \text{Eq(S6)}$$

Given the assumption that each Si atom on the surface carries one –OH group, SSD is calculated as:

$$SSD = \frac{N_s}{\pi \cdot d^2} \quad \text{Eq(S7)}$$

Substituting Eq(S5) and Eq(S6) into Eq(S7) gives:

$$SSD = 7.86 + \frac{1.33}{d^2} - \frac{5.61}{d} \quad \text{Eq(S8)}$$

where  $d$  is in nm.

## References

1. Aksel'rud, N.; Spivakovskii, V., Basic chlorides and hydroxides of indium. *Russian J. Inorg. Chem* **1959**, *4*, 449-453.
2. Baes, C. F.; Mesmer, R. E., *The hydrolysis of cations*. Wiley New York: 1976; Vol. 68.
3. Drever, J. I., *The geochemistry of natural waters*. prentice Hall New Jersey: 1988; Vol. 437.
4. Biryuk, E.; Nazarenko, V.; Ravitskaya, R., Spectrophotometric determination of the hydrolysis constants of indium ions. *Russian Journal of Inorganic Chemistry* **1969**, *14*, 503-506.
5. Biryuk, E. A.; Nazarenk. Va, Determination of Hydrolysis Constants of Monomeric Gallium Ions in Solutions with 0,1-1,0 Ionic Force. *Zh Neorg Khim+* **1973**, *18*, (11), 2964-2967.
6. Vagramjan, A.; Leshawa, T., Untersuchung der Potentiale von Galliumelektroden und der Polarisierung beim elektrolytischen Abscheiden von Gallium in Abhängigkeit von dessen Aggregatzustand. *Zeitschrift für Physikalische Chemie (Leipzig)* **1967**, *234*, 57-70.
